# Supplementary material
Source: PubMed Central journal article supplement (PMC2148355)

**a**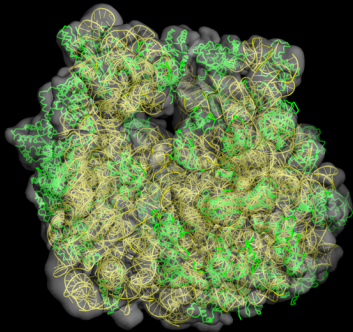**b**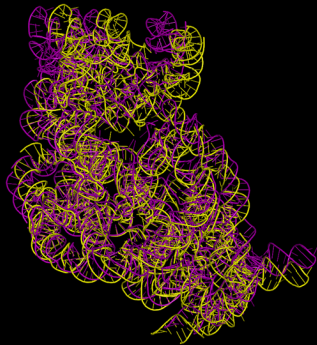**c**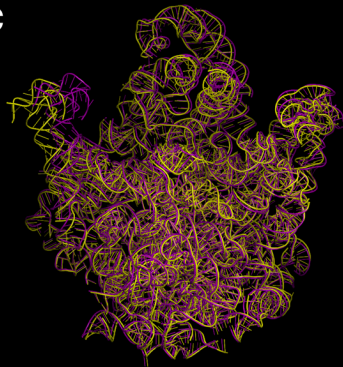

Supplement: pnas_0708517104_1.pdf [file pnas_0708517104_1.pdf]

70S

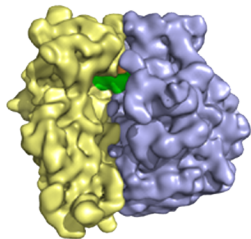

70S·IF2

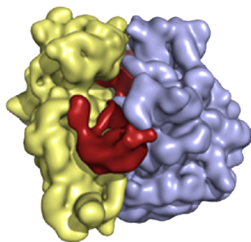

70S·EF-G

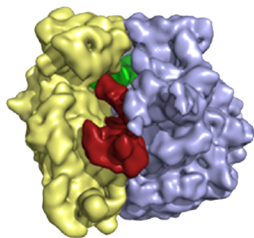

70S·RF3

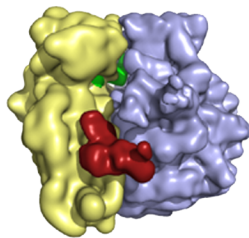

70S·RRF

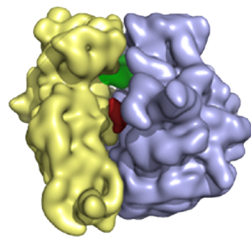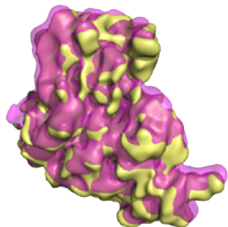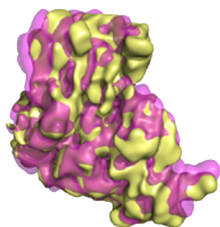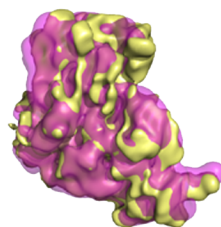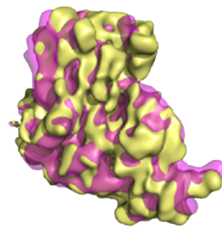

Supplement: pnas_0708517104_2.pdf [file pnas_0708517104_2.pdf]

pre-translocational ribosome

EF-F-GTP binds to ribosome

ratcheted ribosome; hybrid-state tRNA

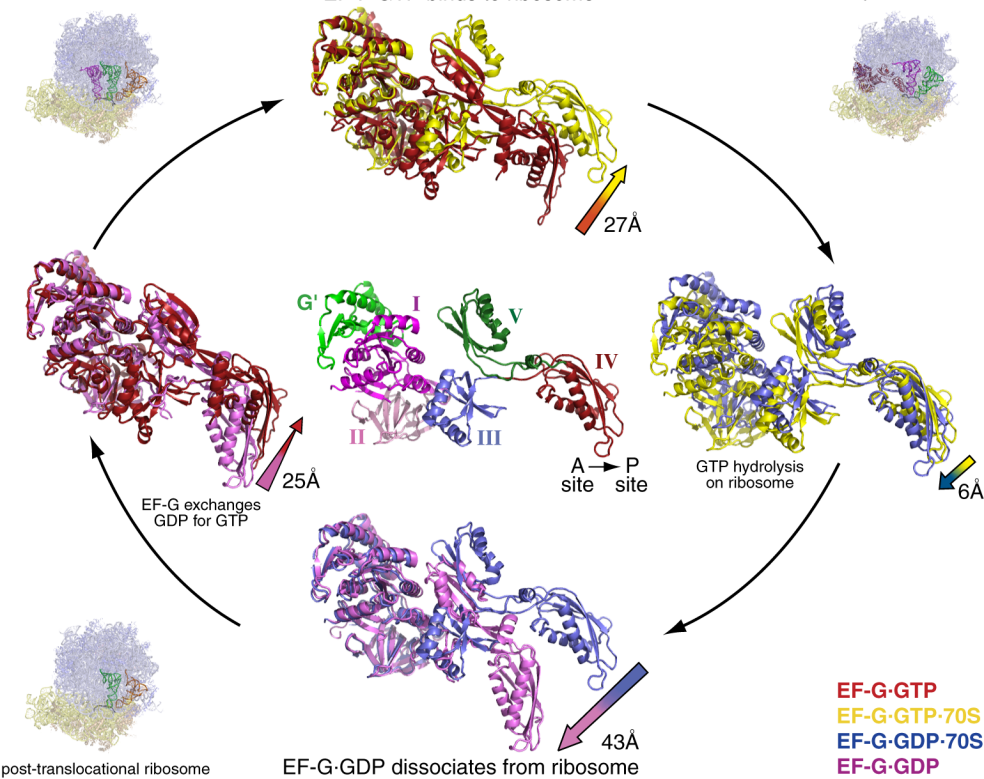

Supplement: pnas_0708517104_3.pdf [file pnas_0708517104_3.pdf]
